# Supplementary material for: Phytoplankton of the High-Latitude Arctic: Intensive Growth Large Diatoms Porosira glacialis in the Nansen Basin
Source: MDPI journal article supplement (doi:10.3390/jmse11020453), 2023-02-18
Supplement: s1 [file s1]

# Supplementary Materials for

## Phytoplankton of the High-Latitude Arctic: Intensive Growth Large Diatoms *Porosira glacialis* in the Nansen Basin

Larisa Pautova <sup>1</sup>, Vladimir Silkin <sup>1,\*</sup>, Marina Kravchishina <sup>1</sup>, Alexey Klyuvitkin <sup>1</sup>,  
Elena Kudryavtseva <sup>1</sup>, Dmitry Glukhovets <sup>1,2</sup>, Anna Chultsova <sup>1</sup> and Nadezhda Politova <sup>1</sup>

<sup>1</sup> Shirshov Institute of Oceanology, Russian Academy of Sciences, 117997 Moscow, Russia

<sup>2</sup> Moscow Institute of Physics and Technology, 141700 Dolgoprudny, Russia

\* Correspondence: vsilkin@mail.ru; Tel.: +7-918-200-7560

This file includes:

Figure S1

Table S1–S5

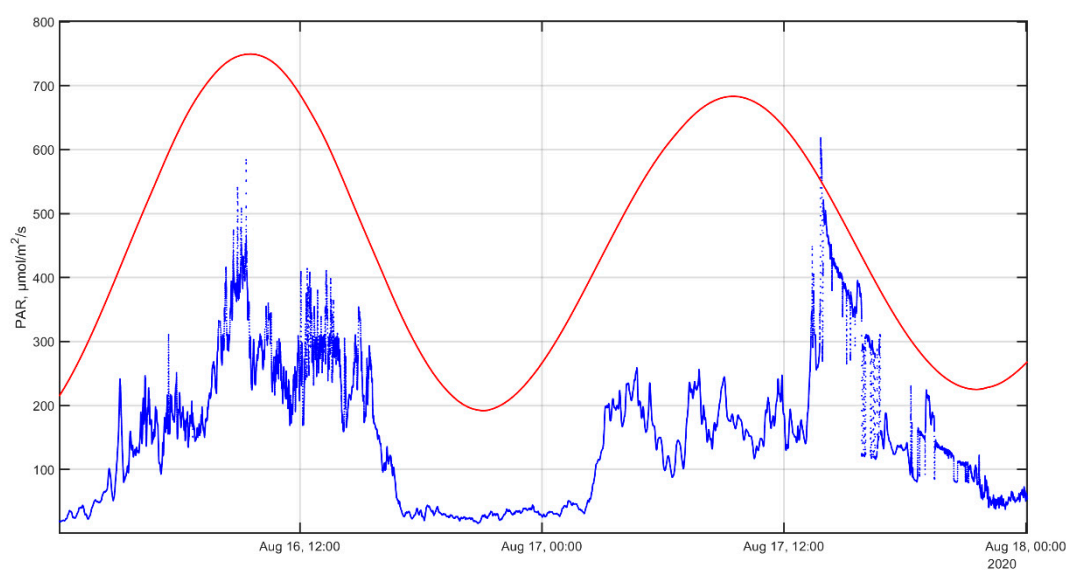

Figure S1. PAR values along the R/V track. The red line shows the estimated values for the case of a cloudless sky. August 16–17, 2020

Table S1. The location of stations, time of sampling, depth of the thermocline, the halocline and the pycnocline.

| Station | Latitude | Longitude | Day | Month | Year | Time     | Depth of        |               |                |
|---------|----------|-----------|-----|-------|------|----------|-----------------|---------------|----------------|
|         |          |           |     |       |      |          | Thermo<br>cline | Halo<br>cline | Pycno<br>cline |
| A-1     | 83.26784 | 38.24809  | 17  | Aug   | 2020 | 7:28:44  | 8.80            | 8.80          | 8.80           |
| A-2     | 83.28076 | 38.18286  | 17  | Aug   | 2020 | 13:23:28 | 8.00            | 8.00          | 8.00           |
| B-1     | 83.07206 | 34.76428  | 18  | Aug   | 2020 | 3:05:04  | 13.00           | 8.40          | 8.40           |
| B-2     | 83.06986 | 34.57684  | 18  | Aug   | 2020 | 7:05:57  | 3.40            | 3.20          | 3.20           |
| C       | 82.26038 | 36.54452  | 18  | Aug   | 2020 | 15:02:59 | 10.2            | 10.2          | 10.2           |
| D       | 81.55444 | 37.86584  | 16  | Aug   | 2020 | 10:01:24 | 14.20           | 15.40         | 15.40          |
| E       | 81.69192 | 40.87944  | 16  | Aug   | 2020 | 15:11:53 | 15.60           | 17.80         | 16.80          |
| F       | 80.98374 | 40.76701  | 19  | Aug   | 2020 | 8:54:27  | 22.80           | 21.40         | 21.40          |
| G       | 80.26804 | 42.97324  | 19  | Aug   | 2020 | 17:21:48 | 30.80           | 27.80         | 27.80          |

Table S2. Temperature, salinity and density at mPSW, at the score of PSW and AW and the depth where temperature equal 0 and 1 °C at all sampling station.

| Depth      | Temperature | Salinity | Density |
|------------|-------------|----------|---------|
| <b>A-1</b> |             |          |         |
| 3.6        | -1.49       | 30.91    | 24.85   |
| 40.4       | -1.77       | 34.15    | 27.49   |
| 89         | 0.00        | 34.49    | 27.70   |
| 102.4      | 1.02        | 34.65    | 27.77   |
| 213        | 2.55        | 34.92    | 27.86   |
| <b>A-2</b> |             |          |         |
| 2.4        | -1.43       | 30.72    | 24.69   |
| 55.8       | -1.77       | 34.19    | 27.52   |
| 88.4       | 0.00        | 34.49    | 27.70   |
| 102        | 1.00        | 34.63    | 27.75   |
| 165.6      | 2.53        | 34.89    | 27.84   |
| 184        | 2.56        | 34.91    | 27.85   |
| <b>B-1</b> |             |          |         |
| 2.6        | -1.42       | 31.17    | 25.06   |
| 3.8        | -1.44       | 31.09    | 25.00   |
| 62.6       | -1.77       | 34.20    | 27.53   |
| 92.8       | 0.02        | 34.52    | 27.72   |
| 101.4      | 1.03        | 34.67    | 27.77   |
| 174.8      | 2.66        | 34.90    | 27.83   |
| <b>B-2</b> |             |          |         |
| 0.6        | -1.44       | 31.28    | 25.15   |
| 58.2       | -1.79       | 34.17    | 27.51   |
| 94.2       | -0.01       | 34.51    | 27.71   |
| 110.8      | 0.98        | 34.63    | 27.75   |
| 173.2      | 2.51        | 34.89    | 27.84   |
| 186.6      | 2.54        | 34.90    | 27.85   |

|          |         |         |         |
|----------|---------|---------|---------|
| 209.4    | 2.54    | 34.92   | 27.86   |
| <b>C</b> |         |         |         |
| 0.6      | 2.70    | 32.98   | 26.30   |
| 7.8      | 2.73    | 32.99   | 26.30   |
| 41.6     | -1.42   | 34.20   | 27.52   |
| 68       | -0.02   | 34.60   | 27.78   |
| 84.8     | 1.04    | 34.72   | 27.82   |
| 123.8    | 2.00    | 34.83   | 27.84   |
| 138.2    | 2.22    | 34.87   | 27.85   |
| <b>D</b> |         |         |         |
| 1.2      | 2.99    | 32.82   | 26.14   |
| 2.4      | 3.00    | 32.91   | 26.21   |
| 40       | -1.31   | 34.22   | 27.53   |
| 61.8     | 0.01    | 34.58   | 27.77   |
| 78.2     | 1.01    | 34.70   | 27.80   |
| 133.2    | 2.01    | 34.87   | 27.86   |
| <b>E</b> |         |         |         |
| 1.6      | 1.8684  | 32.0951 | 25.6543 |
| 6.2      | 1.8736  | 32.0923 | 25.6515 |
| 10.2     | 1.1831  | 32.4042 | 25.9472 |
| 10.8     | 0.837   | 32.5204 | 26.0613 |
| 13.6     | -0.0413 | 32.7441 | 26.2871 |
| 19.6     | -1.0001 | 33.5059 | 26.9424 |
| 43.2     | -1.7309 | 34.0791 | 27.4304 |
| 76.4     | -1.0021 | 34.3567 | 27.6321 |
| 86       | -0.0166 | 34.5144 | 27.7151 |
| 96.2     | 1.0029  | 34.6465 | 27.7611 |
| 248.8    | 2.4324  | 34.9231 | 27.8743 |
| <b>F</b> |         |         |         |
| 1        | 3.31    | 33.01   | 26.27   |
| 24       | -0.05   | 33.55   | 26.94   |
| 40.6     | -1.43   | 34.17   | 27.49   |
| 66.6     | 0.00    | 34.62   | 27.80   |
| 80.4     | 0.99    | 34.76   | 27.85   |
| 115.2    | 1.77    | 34.84   | 27.86   |
| <b>G</b> |         |         |         |
| 2.2      | 3.72    | 33.69   | 26.77   |
| 2.4      | 3.72    | 33.69   | 26.77   |
| 13.6     | 3.72    | 33.69   | 26.77   |
| 26       | 1.05    | 33.90   | 27.15   |
| 27.4     | 0.01    | 33.80   | 27.13   |
| 74.8     | -1.10   | 34.56   | 27.80   |

Table S3. The concentration of silicates, phosphates and nitrates at various depths at all the stations studied.

| Date  | Time  | Station | Depth on station<br>m | Depth<br>m | Temp<br>° C | Sal<br>psu | Si<br>μM | PO <sub>4</sub> <sup>3-</sup><br>μM | NO <sub>3</sub> <sup>-</sup><br>μM |
|-------|-------|---------|-----------------------|------------|-------------|------------|----------|-------------------------------------|------------------------------------|
| 08.17 | 9:10  | A       | 3703                  | 5          | -1.39       | 31.85      | 0.00     | 0.09                                | 0.00                               |
|       |       |         |                       | 11         | -1.35       | 33.32      | 0.16     | 0.39                                | 0.18                               |
|       |       |         |                       | 22         | -1.58       | 34.04      | 1.56     | 0.32                                | 3.82                               |
|       |       |         |                       | 75         | -1.15       | 34.33      | 2.92     | 0.60                                | 7.25                               |
|       |       |         |                       | 100        | 1.22        | 34.64      | 3.97     | 0.63                                | 10.01                              |
| 08.18 | 8:05  | B       | 3670                  | 9          | -1.41       | 32.48      | 1.19     | 0.20                                | 1.51                               |
|       |       |         |                       | 35         | -1.74       | 34.12      | 2.24     | 0.40                                | 5.01                               |
|       |       |         |                       | 73         | -1.70       | 34.23      | 2.29     | 0.42                                | 5.79                               |
|       |       |         |                       | 100        | 0.28        | 34.52      | 3.44     | 0.58                                | 9.01                               |
| 08.18 | 16:30 | C       | 2162                  | 13         | -0.17       | 32.90      | 0.21     | 0.03                                | 0.00                               |
|       |       |         |                       | 31         | -1.64       | 34.06      | 0.42     | 0.29                                | 1.05                               |
|       |       |         |                       | 46         | -1.69       | 34.12      | 1.88     | 0.59                                | 8.29                               |
|       |       |         |                       | 100        | 1.27        | 34.68      | 4.18     | 0.72                                | 9.54                               |
| 08.16 | 14:32 | D       | 426                   | 2          | 2.89        | 32.95      | 0.57     | 0.06                                | 0.00                               |
|       |       |         |                       | 8          | 2.78        | 32.97      | 1.14     | 0.06                                | 0.00                               |
|       |       |         |                       | 13         | 2.32        | 32.90      | 0.88     | 0.07                                | 0.00                               |
|       |       |         |                       | 21         | -1.08       | 33.79      | 0.68     | 0.10                                | 0.05                               |
|       |       |         |                       | 28         | -1.29       | 34.02      | 1.30     | 0.24                                | 0.05                               |
|       |       |         |                       | 37         | -1.37       | 34.23      | 1.15     | 0.49                                | 3.83                               |
|       |       |         |                       | 100        | 1.63        | 34.77      | 5.07     | 0.73                                | 10.87                              |
| 08.16 | 16:59 | E       | 409                   | 5          | 2.97        | 32.92      | 0.16     | 0.00                                | 0.00                               |
|       |       |         |                       | 16         | -0.32       | 33.78      | 0.36     | 0.21                                | 0.00                               |
|       |       |         |                       | 41         | -1.27       | 34.24      | 0.94     | 0.42                                | 5.14                               |
|       |       |         |                       | 87         | 1.64        | 34.77      | 4.60     | 0.61                                | 10.59                              |
|       |       |         |                       | 141        | 1.92        | 34.86      | 4.70     | 0.70                                | 11.67                              |
| 08.19 | 10:21 | F       | 593                   | 5          | 3.30        | 33.00      | 0.36     | 0.07                                | 0.00                               |
|       |       |         |                       | 21         | 1.58        | 33.36      | 0.47     | 0.11                                | 0.00                               |
|       |       |         |                       | 47         | -1.37       | 34.31      | 2.71     | 0.63                                | 7.36                               |
|       |       |         |                       | 112        | 1.77        | 34.84      | 4.65     | 0.73                                | 9.86                               |
| 08.21 | 19:01 | G       | 403                   | 21         | 3.67        | 33.69      | 0.47     | 0.13                                | 0.00                               |
|       |       |         |                       | 114        | -0.02       | 34.72      | 3.39     | 0.66                                | 8.13                               |

Table S4. Total biomass of the phytoplankton, temperature and salinity at sampling stations in the Nansen Basin and the Barents Sea in August 2020

| Stations | Depth | Total biomass                    |                        | Temp    | Salinity |
|----------|-------|----------------------------------|------------------------|---------|----------|
|          |       | wet weight,<br>mg/m <sup>3</sup> | mg<br>C/m <sup>3</sup> | °C      | psu      |
| A        | 0 m   | 141.3                            | 8.03                   |         |          |
|          | 5 m   | 296.83                           | 8.46                   | -1.4805 | 30.9972  |
|          | 10 m  | 29876.19                         | 799.07                 | -1.3295 | 33.2066  |

|   |        |        |       |         |         |
|---|--------|--------|-------|---------|---------|
|   | 15 m   | 25.1   | 0.89  | -1.4308 | 33.7272 |
|   | 20 m   | 20.46  | 0.95  | -1.5568 | 34.0193 |
|   | 25 m   | 25.47  | 0.75  | -1.6499 | 34.0808 |
|   | 30 m   | 10.84  | 0.37  | -1.7063 | 34.114  |
|   | 35 m   | 8.95   | 0.26  | -1.7516 | 34.1387 |
|   | 40 m   | 2.76   | 0.13  | -1.7699 | 34.1535 |
|   | 74 m   | 0.61   | 0.02  | -1.4459 | 34.2892 |
|   | 100 m  | 1.78   | 0.12  | 0.7753  | 34.5904 |
|   | 200 m  | 1.17   | 0.04  | 2.4652  | 34.897  |
|   | 800 m  | 2.84   | 0.12  |         |         |
|   | 3000 m | 0.92   | 0.04  |         |         |
| B | 0 m    | 8.59   | 0.26  | -1.4386 | 31.2834 |
|   | 3 m    | 30.6   | 1.00  | -1.4242 | 31.6468 |
|   | 8 m    | 21.64  | 0.64  | -1.3419 | 33.3614 |
|   | 15 m   | 7.48   | 0.21  | -1.4798 | 33.7293 |
|   | 24 m   | 1.64   | 0.09  | -1.6183 | 34.0548 |
|   | 34 m   | 2.92   | 0.13  | -1.695  | 34.1069 |
|   | 46 m   | 8.49   | 0.24  | -1.764  | 34.1449 |
|   | 72 m   | 1.83   | 0.08  | -1.7452 | 34.2303 |
|   | 91 m   | 0.72   | 0.03  | -0.3702 | 34.4591 |
|   | 100 m  | 0.39   | 0.02  | 0.4794  | 34.5755 |
|   | 185 m  | 0.56   | 0.02  | 2.5298  | 34.9011 |
| C | 0 m    | 10.78  | 0.96  |         |         |
|   | 2 m    | 9.33   | 0.87  | 1.8683  | 32.0958 |
|   | 6 m    | 18.1   | 1.78  | 1.8736  | 32.0923 |
|   | 10 m   | 13.19  | 1.28  | 1.1831  | 32.4042 |
|   | 16 m   | 31.03  | 2     | -0.6714 | 33.0373 |
|   | 22 m   | 67.5   | 4.32  | -1.2469 | 33.7712 |
|   | 30 m   | 166.58 | 7.05  | -1.5493 | 34.0188 |
|   | 38 m   | 556.64 | 25.74 | -1.6836 | 34.0559 |
|   | 45 m   | 109.08 | 3.42  | -1.7291 | 34.0978 |
|   | 100 m  | 48.01  | 1.44  | 1.2283  | 34.6737 |
|   | 245 m  | 12.94  | 0.4   | 2.4104  | 34.9171 |
| D | 0 m    | 64.3   | 4.28  | 2.6994  | 32.9765 |
|   | 2.5 m  | 4.97   | 0.39  | 2.6744  | 32.9942 |
|   | 7 m    | 50.52  | 3.68  | 2.7315  | 32.9891 |
|   | 12 m   | 28.03  | 2.1   | 2.5314  | 33.0144 |
|   | 20 m   | 19.28  | 1.28  | -0.9675 | 33.6585 |
|   | 27 m   | 38.22  | 2.57  | -1.2498 | 33.9695 |
|   | 38 m   | 71.99  | 3.22  | -1.3784 | 34.1833 |
|   | 100 m  | 11.07  | 0.34  | 1.5718  | 34.7719 |
|   | 200 m  | 10.53  | 0.36  | 2.0405  | 34.8907 |
|   | 403 m  | 5.88   | 0.23  | -0.519  | 34.7846 |
| E | 0 m    | 7.17   | 0.54  |         |         |

|   |       |        |      |         |         |
|---|-------|--------|------|---------|---------|
|   | 3.5 m | 7.09   | 0.63 | 2.9939  | 32.9095 |
|   | 10 m  | 2.88   | 0.21 | 2.9455  | 32.9214 |
|   | 16 m  | 41.33  | 3.29 | 1.4203  | 33.1612 |
|   | 26 m  | 18.76  | 1.16 | -1.0479 | 33.896  |
|   | 40 m  | 51.5   | 2.47 | -1.3128 | 34.2206 |
|   | 50 m  | 109.73 | 3.19 | -0.8716 | 34.4029 |
|   | 86 m  | 12.26  | 0.54 | 1.5698  | 34.7757 |
|   | 100 m | 21.64  | 0.81 | 1.6276  | 34.7893 |
|   | 140 m | 2.68   | 0.1  | 1.9933  | 34.8707 |
| F | 0 m   | 37.39  | 3.29 | 3.307   | 33.0067 |
|   | 4 m   | 9.26   | 0.84 | 3.3052  | 33.0067 |
|   | 12 m  | 12.62  | 0.94 | 3.303   | 33.0087 |
|   | 20 m  | 34.23  | 1.76 | 2.9701  | 33.0789 |
|   | 31 m  | 21.24  | 1.02 | -1.1057 | 33.9841 |
|   | 46 m  | 3.96   | 0.17 | -1.381  | 34.2842 |
|   | 60 m  | 7.04   | 0.34 | -0.5104 | 34.5445 |
|   | 100 m | 1.87   | 0.08 | 1.4213  | 34.7897 |
|   | 111 m | 1.32   | 0.07 | 1.7229  | 34.8308 |
| G | 0 m   | 3.37   | 0.21 |         |         |
|   | 4 m   | 1.65   | 0.1  | 3.7179  | 33.6875 |
|   | 12 m  | 2.27   | 0.14 | 3.7178  | 33.6886 |
|   | 20 m  | 4.63   | 0.32 | 3.127   | 33.9058 |
|   | 33 m  | 1.38   | 0.06 | -0.1043 | 34.1763 |
|   | 49 m  | 1.62   | 0.08 | -0.8245 | 34.3731 |
|   | 64 m  | 0.88   | 0.03 | -0.9476 | 34.4859 |
|   | 80 m  | 2.56   | 0.11 | -1.0851 | 34.572  |
|   | 113 m | 1.54   | 0.07 | -0.0071 | 34.7174 |
|   | 250 m | 2.33   | 0.13 | -1.3975 | 34.7192 |
|   | 384 m | 1.44   | 0.08 | -1.3401 | 34.8    |

Table S5. Maximal phytoplankton biomass, temperature, salinity, nutrients concentrations and dominant species.

| Station | Maximal phytoplankton biomass,   |                     | Depth of B <sub>max</sub> | °C    | Salinity | Nutrients |                                    |                                   | Dominant species, % of total biomass |
|---------|----------------------------------|---------------------|---------------------------|-------|----------|-----------|------------------------------------|-----------------------------------|--------------------------------------|
|         | mg weight weight·m <sup>-3</sup> | mgC m <sup>-3</sup> | m                         |       |          | Si, μM    | PO <sub>4</sub> <sup>3-</sup> , μM | NO <sub>3</sub> <sup>-</sup> , μM |                                      |
| (A) *   | 29855                            | 799                 | 10                        | -1.35 | 33.18    | 0.16      | 0.36                               | 0.18                              | <i>Porosira glacialis</i> , 99 %     |
| B *     | 30.60                            | 1.00                | 3                         | -1.41 | 31.30    | -         | -                                  | -                                 | <i>Porosira glacialis</i> , 93%      |
| C       | 166.6                            | 7.05                | 30                        | -1.64 | 34.02    | 0.42      | 0.29                               | 1.05                              | <i>Eucampia groenlandica</i> +       |

|   |        |       |    |       |       |      |      |      |                                                                                                                      |
|---|--------|-------|----|-------|-------|------|------|------|----------------------------------------------------------------------------------------------------------------------|
|   | 556.6  | 25.74 | 38 | -1.68 | 34.05 | -    | -    | -    | <i>Thalassiosira</i> spp.,<br>85%<br><br><i>Chrysophyta</i> , 80%                                                    |
| D | 71.59  | 3.22  | 38 | -1.37 | 34.23 | 1.15 | 0.49 | 3.83 | <i>Eucampia</i><br><i>groenlandica</i> +<br><i>Thalassiosira</i> spp.,<br>61%                                        |
| E | 109.73 | 3.19  | 50 | -1.27 | 34.24 | 0.94 | 0.42 | 5.14 | <i>Porosira glacialis</i> ,<br>99%                                                                                   |
| F | 37.4   | 3.29  | 0  | 3.30  | 33.00 | 0.36 | 0.07 | 0    | <i>Gymnodinium</i> spp.+<br><i>Gyrodinium</i> spp.,<br>76%                                                           |
| G | 4.63   | 0.32  | 20 | 3.67  | 33.69 | 0.47 | 0.13 | 0    | <i>Gymnodinium</i> spp. +<br><i>Protoperidinium</i><br><i>breve</i> +<br><i>Prorocentrum</i><br><i>minimum</i> , 53% |

\* - stations in MIZ, Nansen Basin
